# Supplementary material for: Hepatitis E Virus Mediates Renal Injury via the Interaction between the Immune Cells and Renal Epithelium
Source: MDPI journal article supplement (doi:10.3390/vaccines8030454), 2020-08-14

**Supplementary Materials:**

**Table S1.** The sequences of the primers used in the study.

| <b>Gene</b>   | <b>Primer sequence 5'-3'</b>                                               | <b>Product Size (Bp)</b> |
|---------------|----------------------------------------------------------------------------|--------------------------|
| 18srRNA       | Forward GTAACCCGTTGAACCCATT<br>Reverse CCATCCAATCGGTAGTAGCG                | 151                      |
| MUC-1         | Forward GTGCCCCCTAGCAGTACCG<br>Reverse GACGTGCCCTACAAGTTGG                 | 123                      |
| E-cadherin    | Forward ATTTTCCCTCGACACCCGAT<br>Reverse TCCCAGGCGTAGACCAAGA                | 109                      |
| Aquaporin 1   | Forward CAACTTCAGCAACCACTGGATT<br>Reverse GACCCCTTCTATTTGGGCTTCA           | 207                      |
| ICAM-1        | Forward AGCTTCGTGTCCTGTATGGC<br>Reverse TTTTCTGGCCACGTCCAGTT               | 70                       |
| IL-6          | Forward TGAACCTCTTCCACAAGCG<br>Reverse TCTGAAGAGGTGAGTGGCTGTC              | 151                      |
| IL-8          | Forward ATGACTTCCAAGCTGGCCGTGGCT<br>Reverse TCTCAGCCCTCTCAAAACTTCTC        | 292                      |
| IL- $\beta$ 1 | Forward AGCCATGGCAGAAGTACCTG<br>Reverse CCTGGAAGGAGCACTTCATCT              | 116                      |
| MCP-1 (CCL2)  | Forward AGTCTCTGCCGCCCTTCT<br>Reverse GTGACTGGGGCATTGATTG                  | 93                       |
| TNF- $\alpha$ | Forward CCCCAGGGACCTCTCTCTAA<br>Reverse CTCAGCTTGAGGGTTTGCTAC              | 109                      |
| Cxcl-9        | Forward AGTGCAAGGAACCCAGTAG<br>Reverse AGGGCTTGGGGCAAATTGTT                | 112                      |
| Cxcl-10       | Forward: CCACGTGTTGAGATCATTGCT<br>Reverse: TGCATCGATTTTGCTCCCT             | 152                      |
| Cxcl-11       | Forward: GAGTGTGAAGGGCATGGCTA<br>Reverse: ACATGGGAAGCCTTGAACA              | 71                       |
| IFN- $\alpha$ | Forward: CCTGATGAATGCGGACTCCA<br>Reverse: TAGCAGGGGTGAGAGTCTTG             | 265                      |
| IFN- $\beta$  | Forward: CGCCGATTGACCATCTA.<br>Reverse: GACATTAGCCAGGAGGTTCTC.             | 112                      |
| KIM-1         | Forward: CTG CAG GGA GCA ATA AGG AG<br>Reverse: ACC CAA AAG AGC AAG AAG CA | 213                      |
| NGAL          | Forward: GGGAAAGTGGTATGTGGTAGG<br>Reverse: AGGGAAGACGATGTGGTTT             | 423                      |
| IL-18         | Forward: GATAGCCAGCCTAGAGGTATGG<br>Reverse: CCTTGATGTTATCAGGAGGATTCA       | 121                      |

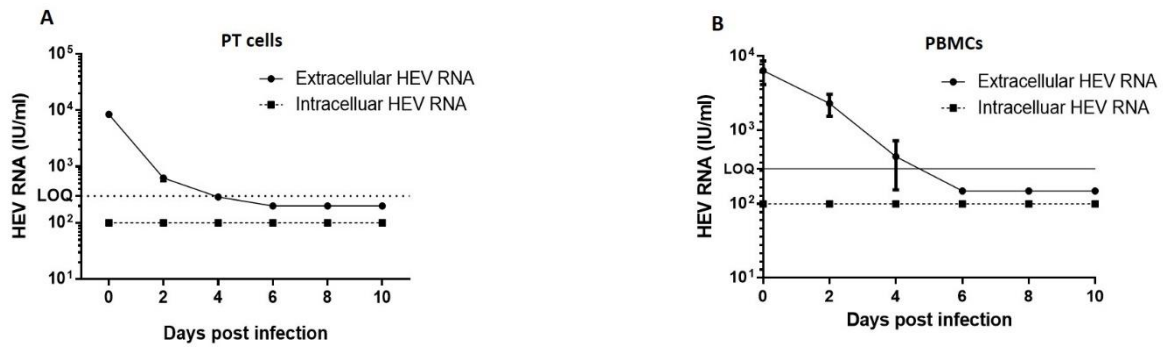

**Figure S1.** Infection of the CD10<sup>+</sup>/CD13<sup>+</sup> PT epithelial cells and PBMCs with UV-inactivated HEV inoculum. Infection of polarized CD10<sup>+</sup>/CD13<sup>+</sup> PT cells (A) and/or PBMCs (B) with UV-inactivated HEV-1 inoculum. Intracellular (dotted line) and extracellular (solid line) HEV RNA was quantified by qPCR. LOQ: limit of quantification. Depicted are the mean values of three independent experiments  $\pm$  SEM.

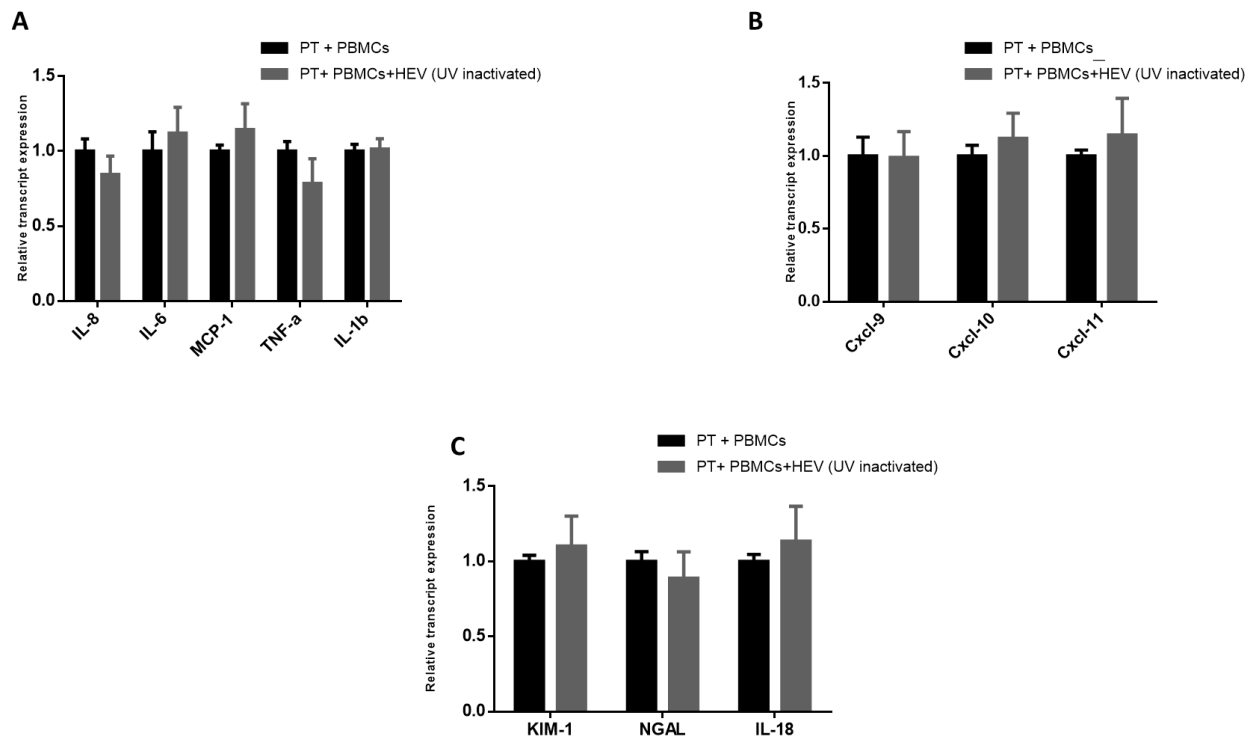

**Figure S2.** Effect of UV inactivated HEV-1 on the coculture of PBMCs with the PT epithelial cells. CD10<sup>+</sup>/CD13<sup>+</sup> PT cells were challenged with UV-inactivated HEV-1 for 7 days and then PBMCs from the same donors were added for an additional 3 days. Total cellular RNA was extracted from the PT cells and the mRNA expression level of proinflammatory markers (IL-8, IL-6, MCP-1, TNF- $\alpha$ , and IL-1 $\beta$ ) (A), chemokines (Cxcl-9, Cxcl-10, and Cxcl-11) (B), and kidney injury transcripts (KIM-1, NGAL, and IL-18) (C) were assessed. The relative gene expression was determined by comparing the expression levels of these transcripts with mock cells (PT +PBMCs). Black columns represent unchallenged cells, and grey columns represent UV inactivated HEV challenged cells.

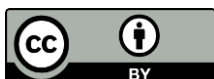

Supplement: s1 [file s1]
